# Supplementary material for: Efficient TiO2/SubPc photocatalyst for degradation of organic dyes under visible light
Source: Royal Society of Chemistry journal article supplement (doi:10.1039/d0nj04383d), 2020-01-01
Supplement: d0nj04383d1.pdf [file d0nj04383d1.pdf]

## Efficient TiO<sub>2</sub>/SubPc photocatalyst for degradation of organic dyes under visible light

Ya-Fei Wang <sup>a</sup>, Bing-Bing Zhang <sup>a</sup>, Zhuo Li <sup>a,b\*</sup>, Bing Wang <sup>a</sup>, Lin-Yu Jiao <sup>a,b</sup>, Chen Wang <sup>a,b</sup>,

Lin Yang <sup>a</sup>, Hai-Xia Ma <sup>a</sup>, Ling-Yan Pang <sup>d</sup>, Xiao-Xun Ma <sup>a,b,c\*</sup>

Table S1. Crystallographic data of H<sub>12</sub>SubPcB-OPhCHO

| Complex                                                          | H <sub>12</sub> SubPcB-OPhCHO                                  |
|------------------------------------------------------------------|----------------------------------------------------------------|
| formula                                                          | C <sub>31</sub> H <sub>17</sub> BN <sub>6</sub> O <sub>2</sub> |
| formula weight                                                   | 516.32                                                         |
| <i>T</i> /K                                                      | 296(2)                                                         |
| crystal system                                                   | Monoclinic                                                     |
| space group                                                      | <i>P</i> 2 <sub>1</sub> / <i>n</i>                             |
| <i>a</i> /Å                                                      | 15.606(3)                                                      |
| <i>b</i> /Å                                                      | 9.991(2)                                                       |
| <i>c</i> /Å                                                      | 16.737(4)                                                      |
| <i>α</i> /°                                                      | 90.00                                                          |
| <i>β</i> /°                                                      | 111.846(4)                                                     |
| <i>γ</i> /°                                                      | 90.00                                                          |
| <i>V</i> /Å <sup>3</sup>                                         | 2422.3(9)                                                      |
| <i>Z</i>                                                         | 4                                                              |
| <i>D</i> /g·cm <sup>-3</sup>                                     | 1.416                                                          |
| <i>F</i> (000)                                                   | 1064                                                           |
| <i>μ</i> /mm <sup>-1</sup>                                       | 0.092                                                          |
| data/restraints/Parameters                                       | 4446/0/362                                                     |
| <i>R</i> <sub>1</sub> <sup>a</sup> [ <i>I</i> > 2σ( <i>I</i> )]  | 0.0664                                                         |
| <i>wR</i> <sub>2</sub> <sup>a</sup> [ <i>I</i> > 2σ( <i>I</i> )] | 0.1367                                                         |

|                                                      |              |
|------------------------------------------------------|--------------|
| $R_I^a$ (all data)                                   | 0.1503       |
| $wR_2^a$ (all data)                                  | 0.1716       |
| Largest diff peak/hole ( $e \cdot \text{\AA}^{-3}$ ) | 0.228,-0.260 |

$$^aR_1 = \frac{\sum ||F_o| - |F_c||}{\sum |F_o|}; wR_2 = [\frac{\sum w(F_o^2 - F_c^2)^2}{\sum w(F_o^2)^2}]^{1/2}$$

Table S2. Selected bond length ( $\text{\AA}$ ) data for SubPc2

| Bond      | Bond length | Bond        | Bond length |
|-----------|-------------|-------------|-------------|
| B(1)-O(1) | 1.460(5)    | C(3)-H(3)   | 0.9300      |
| B(1)-N(5) | 1.482(5)    | C(4)-C(5)   | 1.393(6)    |
| B(1)-N(1) | 1.490(5)    | C(4)-H(4)   | 0.9300      |
| B(1)-N(3) | 1.497(5)    | C(8)-N(2)   | 1.339(4)    |
| C(1)-N(6) | 1.342(5)    | C(8)-N(1)   | 1.361(4)    |
| C(1)-N(1) | 1.358(4)    | C(9)-N(2)   | 1.352(4)    |
| C(1)-C(2) | 1.462(5)    | C(9)-C(10)  | 1.444(5)    |
| C(2)-C(3) | 1.389(5)    | C(10)-C(15) | 1.419(5)    |

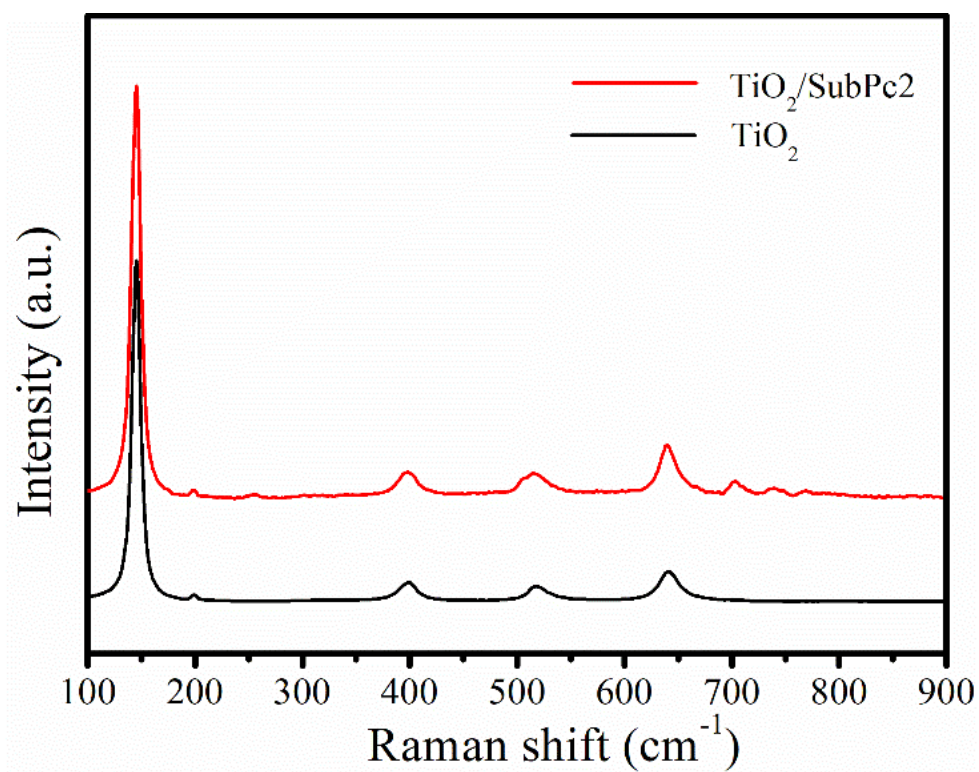

Fig. S1. Raman spectra of TiO<sub>2</sub> and TiO<sub>2</sub>/SubPc<sub>2</sub> (25:1).

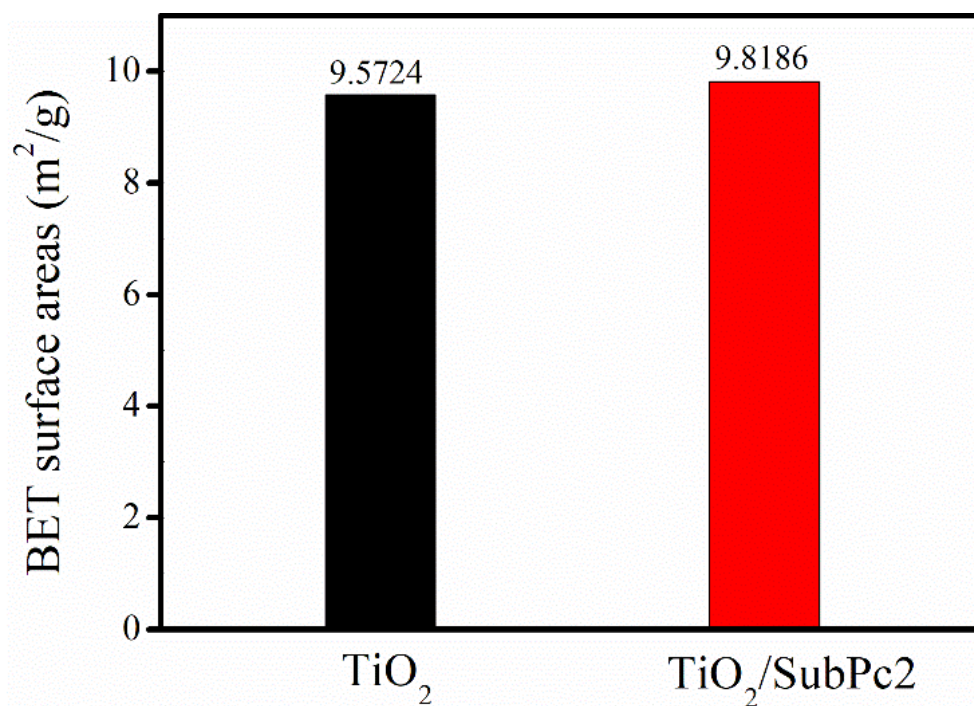

Fig. S2. The BET surface area of TiO<sub>2</sub> and TiO<sub>2</sub>/SubPc<sub>2</sub> (25:1).

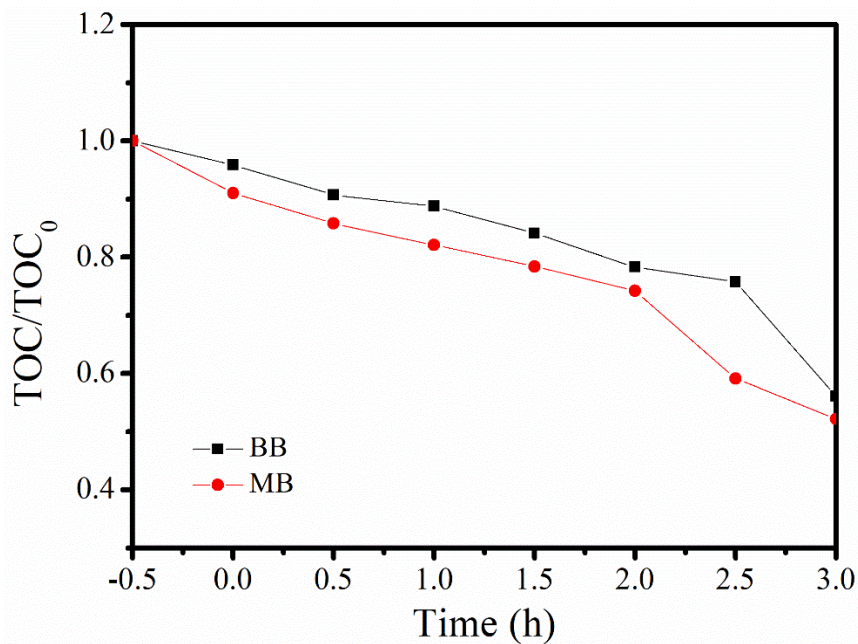

Fig. S3. TOC evolution during BB and MB photodegradation on  $\text{TiO}_2/\text{SubPc}_2$  (25:1) photocatalytic.

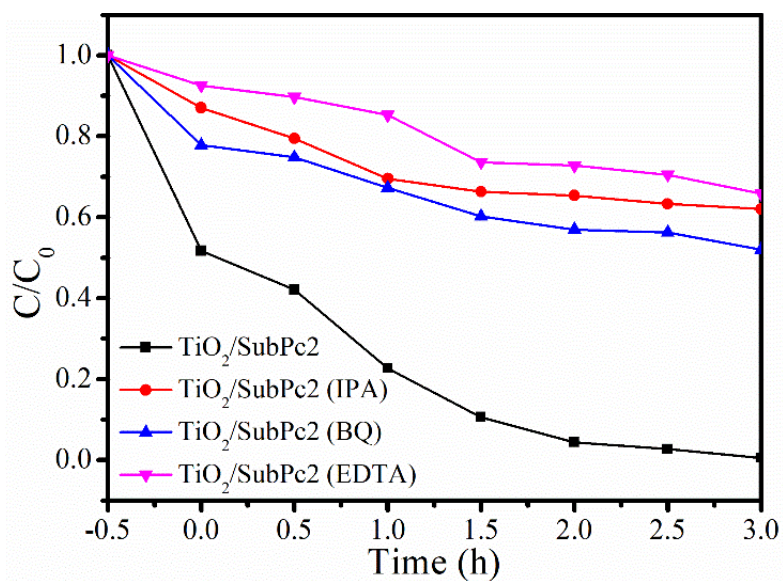

Fig. S4. Effects of different scavengers on BB photodegradation using  $\text{TiO}_2/\text{SubPc}_2$  (25:1) photocatalyst under visible light irradiation.

The CCDC number of the SubPc2 is 2026629.

Published in NEW JOURNAL OF CHEMISTRY
